# Supplementary material for: Neuroligin-1 mediates presynaptic maturation through brain-derived neurotrophic factor signaling
Source: PubMed Central journal article supplement (PMC8474808; doi:10.1186/s12915-021-01145-7), 2021-09-27

Additional File 6: Fig. S6

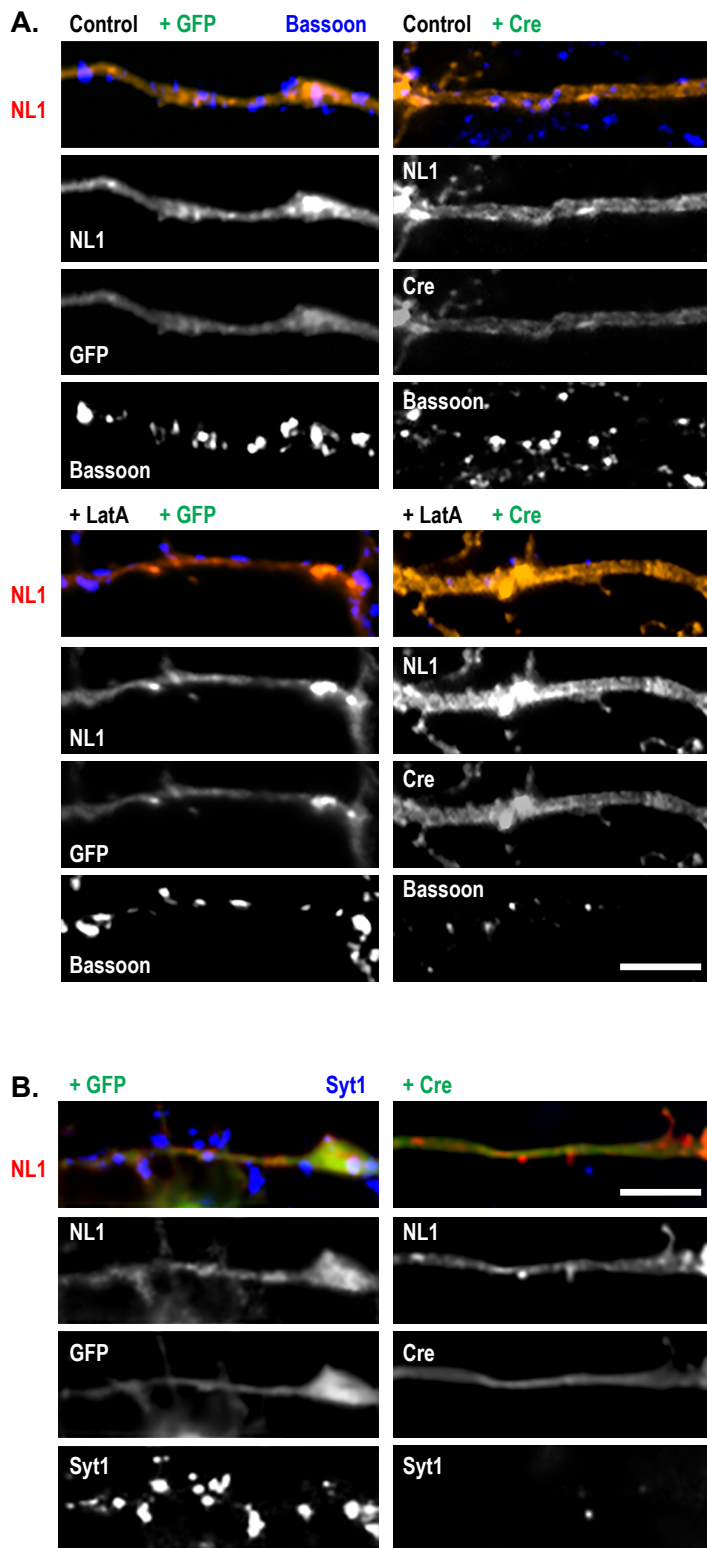

Supplement: 12915_2021_1145_MOESM6_ESM.pdf [file 12915_2021_1145_MOESM6_ESM.pdf]
